# Supplementary material for: Room temperature tunable multicolor phosphorescent polymers for humidity detection and information encryption
Source: Royal Society of Chemistry journal article supplement (doi:10.1039/d2ra00294a), 2022-01-01
Supplement: d2ra00294a1.pdf [file d2ra00294a1.pdf]

## Supplementary Information

### Room temperature tunable multicolor phosphorescent polymers for humidity detection and information encryption

Yulei Gao,<sup>a</sup> Xiang Di,<sup>a</sup> Fenfen Wang<sup>a,\*</sup> and Pingchuan Sun<sup>a,\*</sup>

<sup>a</sup>Key Laboratory of Functional Polymer Materials of Ministry of Education and College of Chemistry, State Key Laboratory of Medicinal Chemical Biology, Nankai University, Tianjin 300071, China

E-mail: wff@mail.nankai.edu.cn; spclbh@nankai.edu.cn

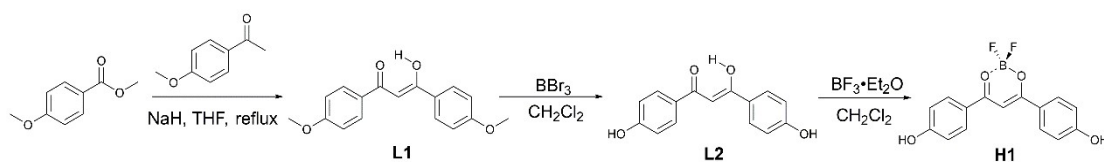

**Scheme S1.** Synthetic route of H1.

Compound 1,3-bis(4-methoxyphenyl)propane-1,3-dione (L1) was synthesized according to the method which has been reported in the earlier literature with same structure.<sup>1</sup>

**Synthesis of 1,3-bis(4-hydroxyphenyl)propane-1,3-dione (L2):** To a solution of L1 (3.46 g, 12.2 mmol) in CH<sub>2</sub>Cl<sub>2</sub> (50 mL) cooled with an ice-salt bath was added dropwise a 1 M CH<sub>2</sub>Cl<sub>2</sub> solution of BBr<sub>3</sub> (36.5 mL, 36.5 mmol). This solution was stirred for 30 min at ice-salt bath, 30 min at 0 °C, 5 h at room-temperature and afterward quenched by dropwise addition of H<sub>2</sub>O (50 mL). Addition of 2 M NaOH (50 mL). The aqueous was adjusted to pH = 6 with conc HCl (aq) caused formation of a yellow precipitate which was then extracted with ethyl acetate 3 times, and the combined organic phase was washed with brine (20 mL), dried (MgSO<sub>4</sub>), filtrated and concentrated under vacuum to afford L2 as a yellow solid (2.77 g, 88.8% yield). <sup>1</sup>H NMR (400 MHz, in

Acetone- $d_6$ ):  $\delta$  17.58 (s, 0.9H), 9.12 (s, 2H), 8.04 (d, 4H), 7.04 (s, 1H), 6.97 (d, 4H), 4.60 (s, 0.1H).

**Synthesis of difluoroboron-1,3-bis(4-hydroxyphenyl)propane-1,3-dione (H1):** To a solution of L2 (2.56 g, 10.0 mmol) in  $\text{CH}_2\text{Cl}_2$  (50 mL) added dropwise  $\text{BF}_3 \cdot \text{Et}_2\text{O}$  (2.5 mL, 20.0 mmol) by a syringe. The mixture was heated slowly to 60 °C for 5.5 h under nitrogen atmosphere. After cooled to room temperature, the mixture was concentrated under reduced pressure. The desire pure product was obtained by recrystallization from ethyl acetate as a yellow solid (2.18 g, 71.7% yield).  $^1\text{H}$  NMR (400 MHz, in Acetone- $d_6$ ):  $\delta$  9.69 (s, 1.5H), 8.25 (d, 4H), 7.51 (s, 1H), 7.06 (d, 4H).

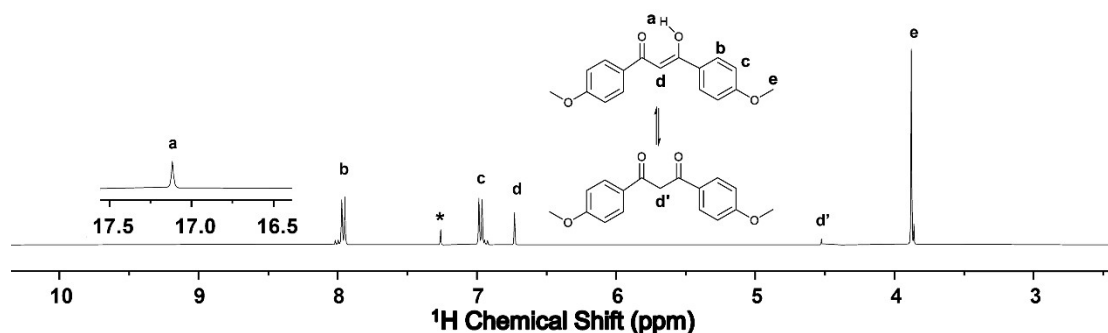

**Figure S1.** The  $^1\text{H}$  NMR spectrum of L1 in  $\text{CDCl}_3$ .

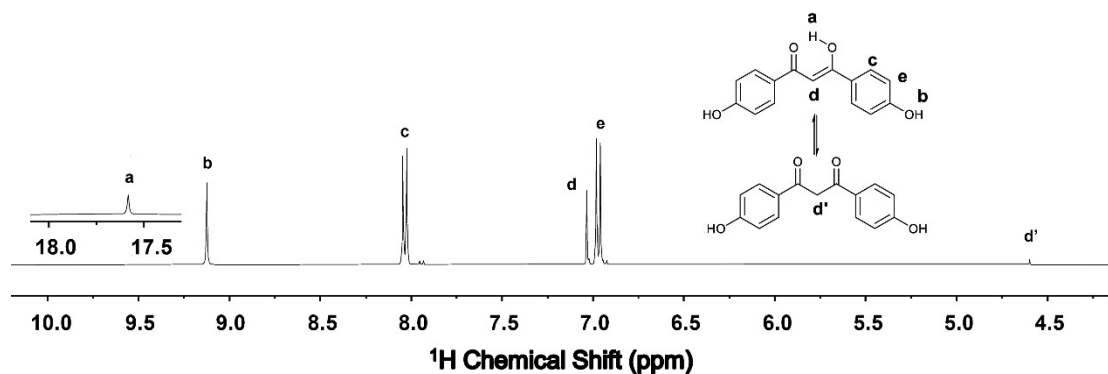

**Figure S2.** The  $^1\text{H}$  NMR spectrum of L2 in Acetone- $d_6$ .

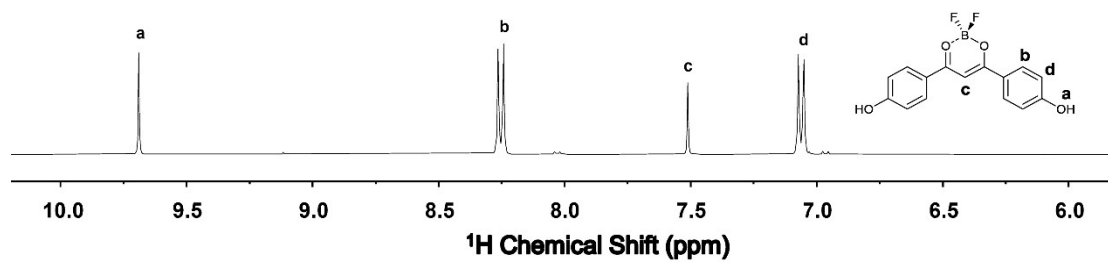

**Figure S3.** The  $^1\text{H}$  NMR spectrum of H1 in Acetone- $\text{d}_6$ .

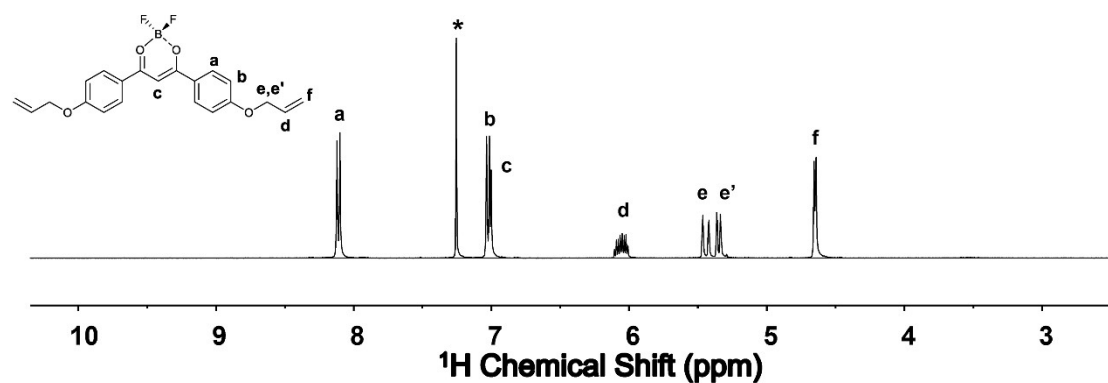

**Figure S4.** The  $^1\text{H}$  NMR spectrum of  $\text{BF}_2\text{bad}$  in  $\text{CDCl}_3$ .

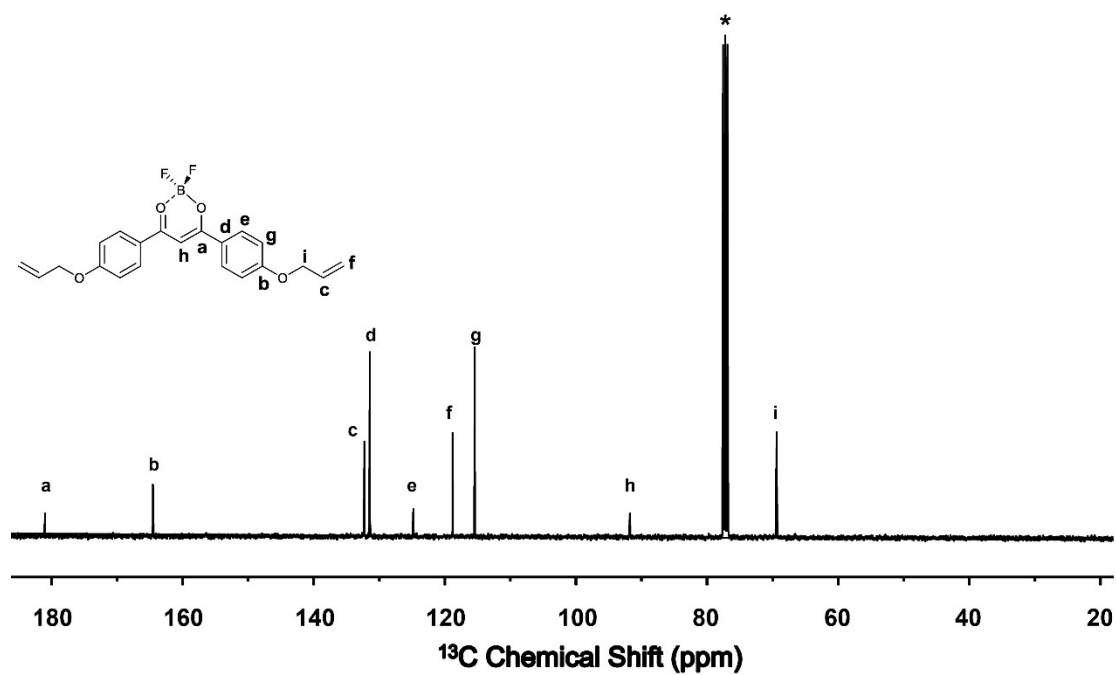

**Figure S5.** The  $^{13}\text{C}$  NMR spectrum of  $\text{BF}_2\text{bad}$  in  $\text{CDCl}_3$ .

**Table S1.** Monomer proportions and yields of SPAP.

| Sample      | BF <sub>2</sub> bad<br>[mg] | AM<br>[mg] | AIBN<br>[mg] | DMSO<br>[mL] | SPAP<br>[mg] |
|-------------|-----------------------------|------------|--------------|--------------|--------------|
| SPAP(1/10)  | 250                         | 463        | 6.4          | 4.5          | 300          |
| SPAP(1/25)  | 100                         | 463        | 6.4          | 4.5          | 350          |
| SPAP(1/50)  | 50                          | 463        | 6.4          | 4.5          | 450          |
| SPAP(1/75)  | 33                          | 463        | 6.4          | 4.5          | 410          |
| SPAP(1/100) | 25                          | 463        | 6.4          | 4.5          | 470          |

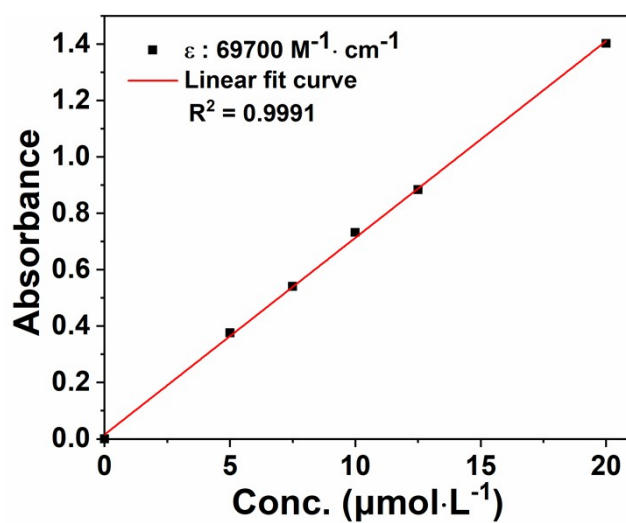

**Figure S6.** Molar extinction coefficient of BF<sub>2</sub>bad in CH<sub>2</sub>Cl<sub>2</sub>.

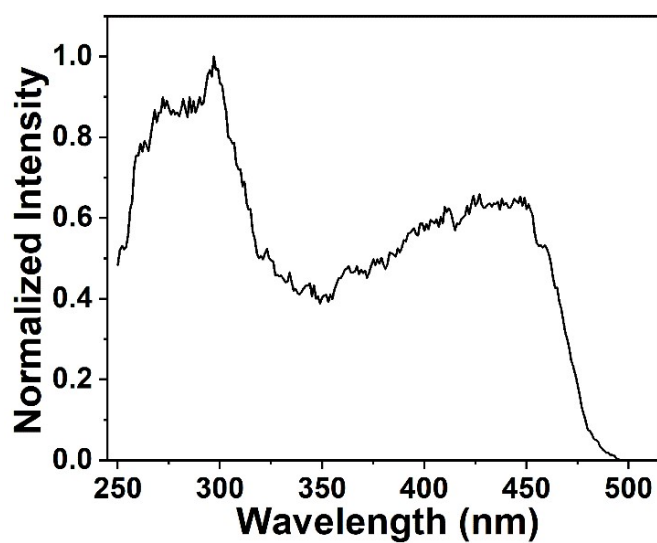

**Figure S7.** Excitation spectra of SPAP(1/50) ( $\lambda_{em} = 518$  nm).

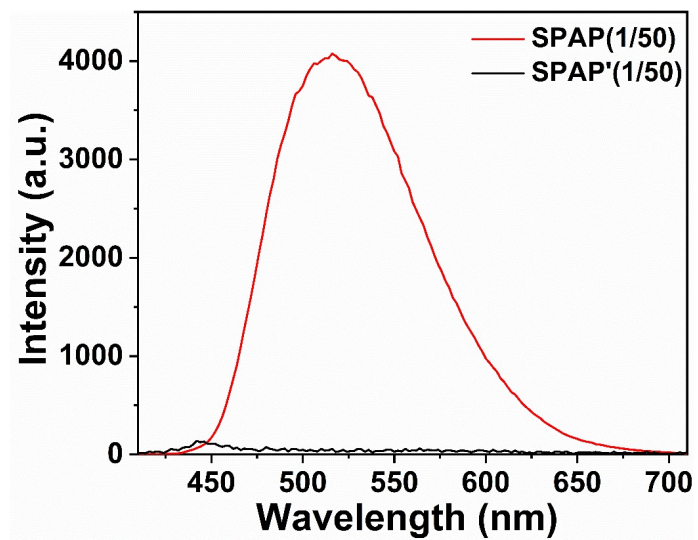

**Figure S8.** RTP emission spectra of SPAP(1/50) and SPAP'(1/50).

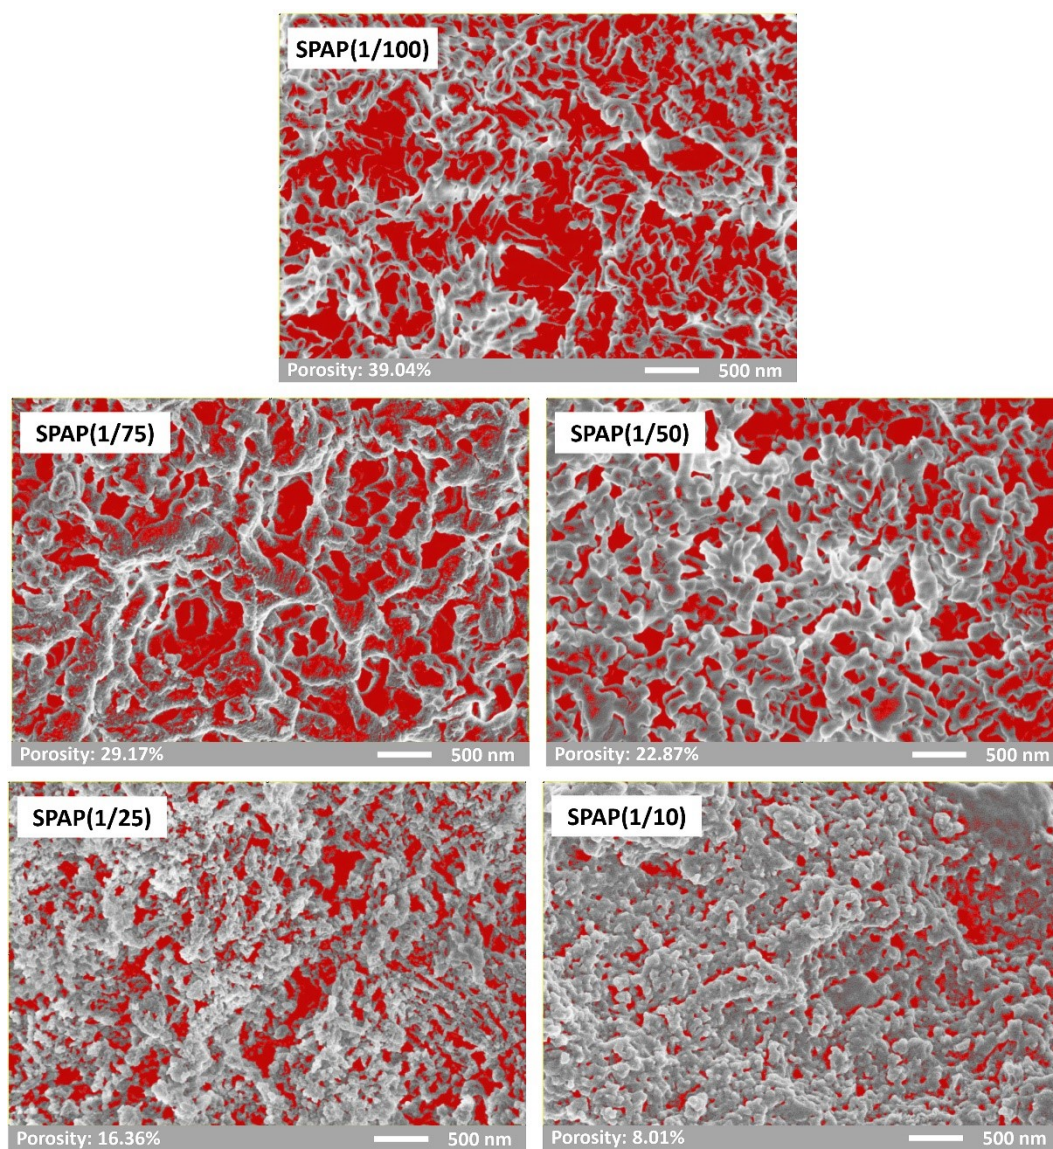

**Figure S9.** The estimated porosity of SPAP using ImageJ. The part as red color marked is the pore.

1. J. L. Howard, Y. Sagatov, L. Repousseau, C. Schotten and D. L. Browne, *Green Chem.*, 2017, **19**, 2798-2802.
